# Supplementary material for: Specific activation of glycolytic enzyme enolase 2 in BRAF V600E‐mutated colorectal cancer
Source: PubMed Central journal article supplement — Cancer Sci. 2021 May 14;112(7):2884–94. doi: 10.1111/cas.14929 (PMC8253290; doi:10.1111/cas.14929), 2021-05-14
Supplement: CAS-112-2884-s001.pdf [file CAS-112-2884-s001.pdf]

**Supplementary Fig. S1**

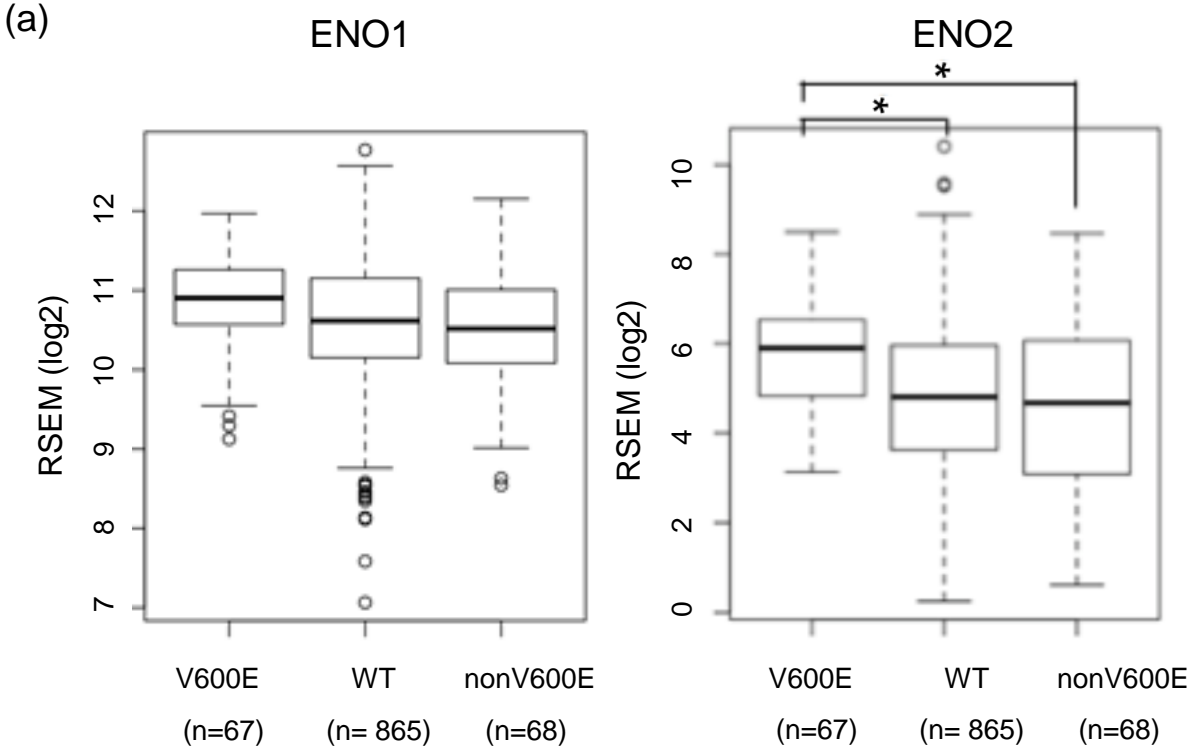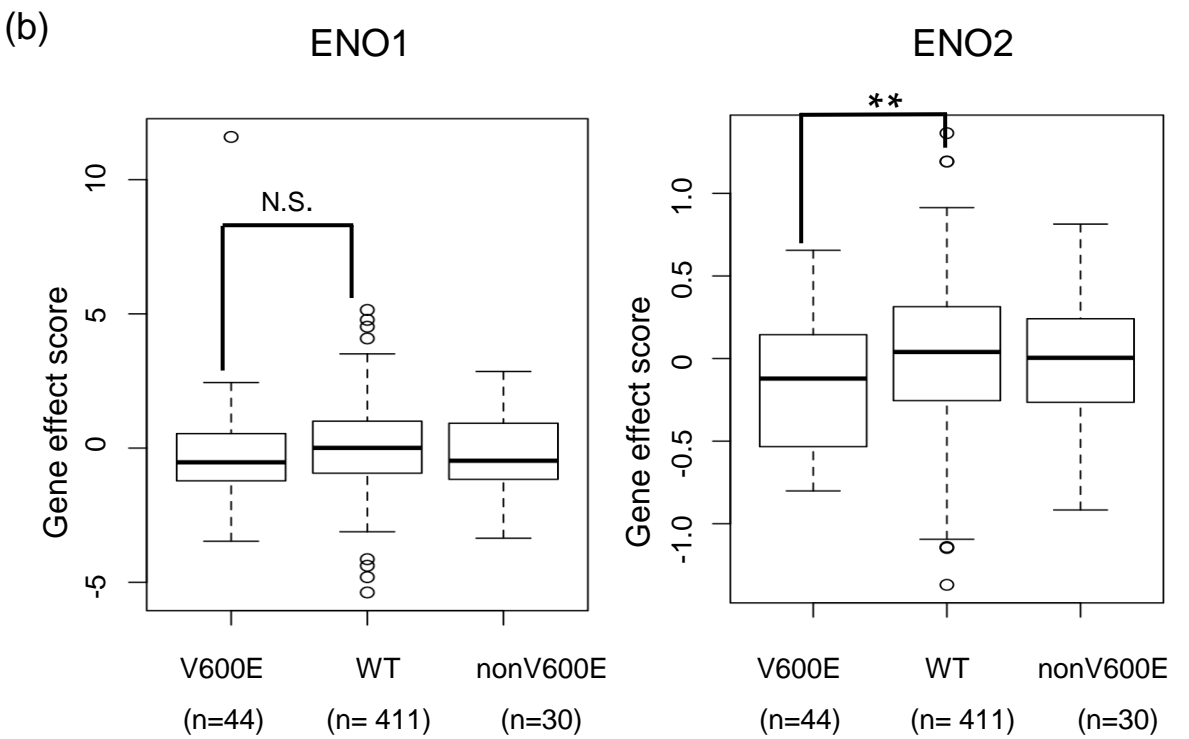

**Supplementary Fig. S1. Expression analysis of ENO1 and ENO2 in cell lines**

- (a) Expression levels of ENO1 and ENO2 according to BRAF mutation status in Cancer Cell Line Encyclopedia (CCLE) database (\*p < 0.0001). CCLE (portals. Broadinstitute.org/ccle).
- (b) Gene effect scores of ENO1 and ENO2 according to BRAF mutation status in Project Achilles database (N.S., not significant : \*\*p < 0.05). Project Achilles (depmap.org/portal/achilles/)

## Supplementary Fig. S2

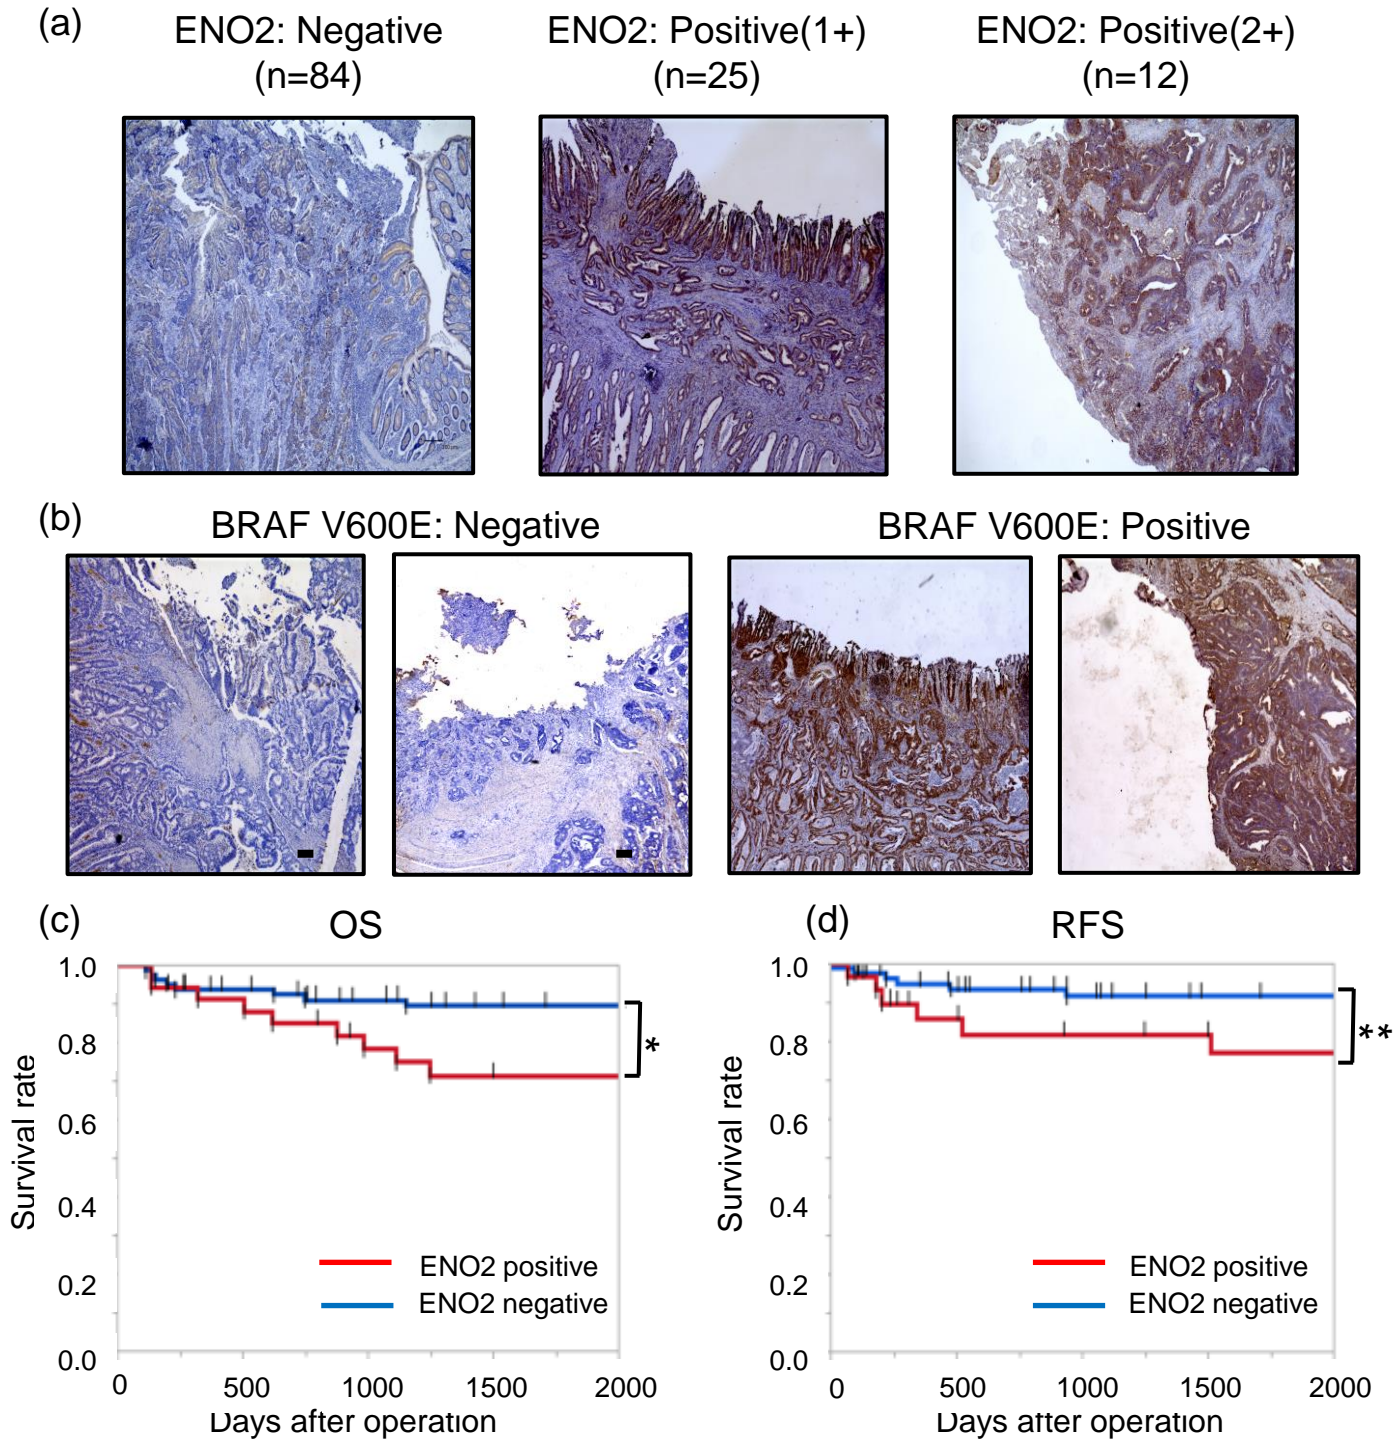

### Supplementary Fig. S2. Immunohistochemical analysis of ENO2 and its prognostic impact in CRC

- (a) Representative images of immunohistochemical staining using anti-ENO2 antibody. Examples of strong, weak and negative intensity are presented. Scale bar: 50  $\mu$ m. Strong and weak staining were defined as ENO2-positive group.
- (b) Representative images of immunohistochemical staining using anti-BRAV600E antibody. Examples of positive and negative intensity are presented. Scale bar: 50  $\mu$ m.
- (c,d) Kaplan–Meier curves for (c) overall survival and (d) relapse-free survival, according to ENO2 expression status in patients with CRC.

**Supplementary Fig. S3**

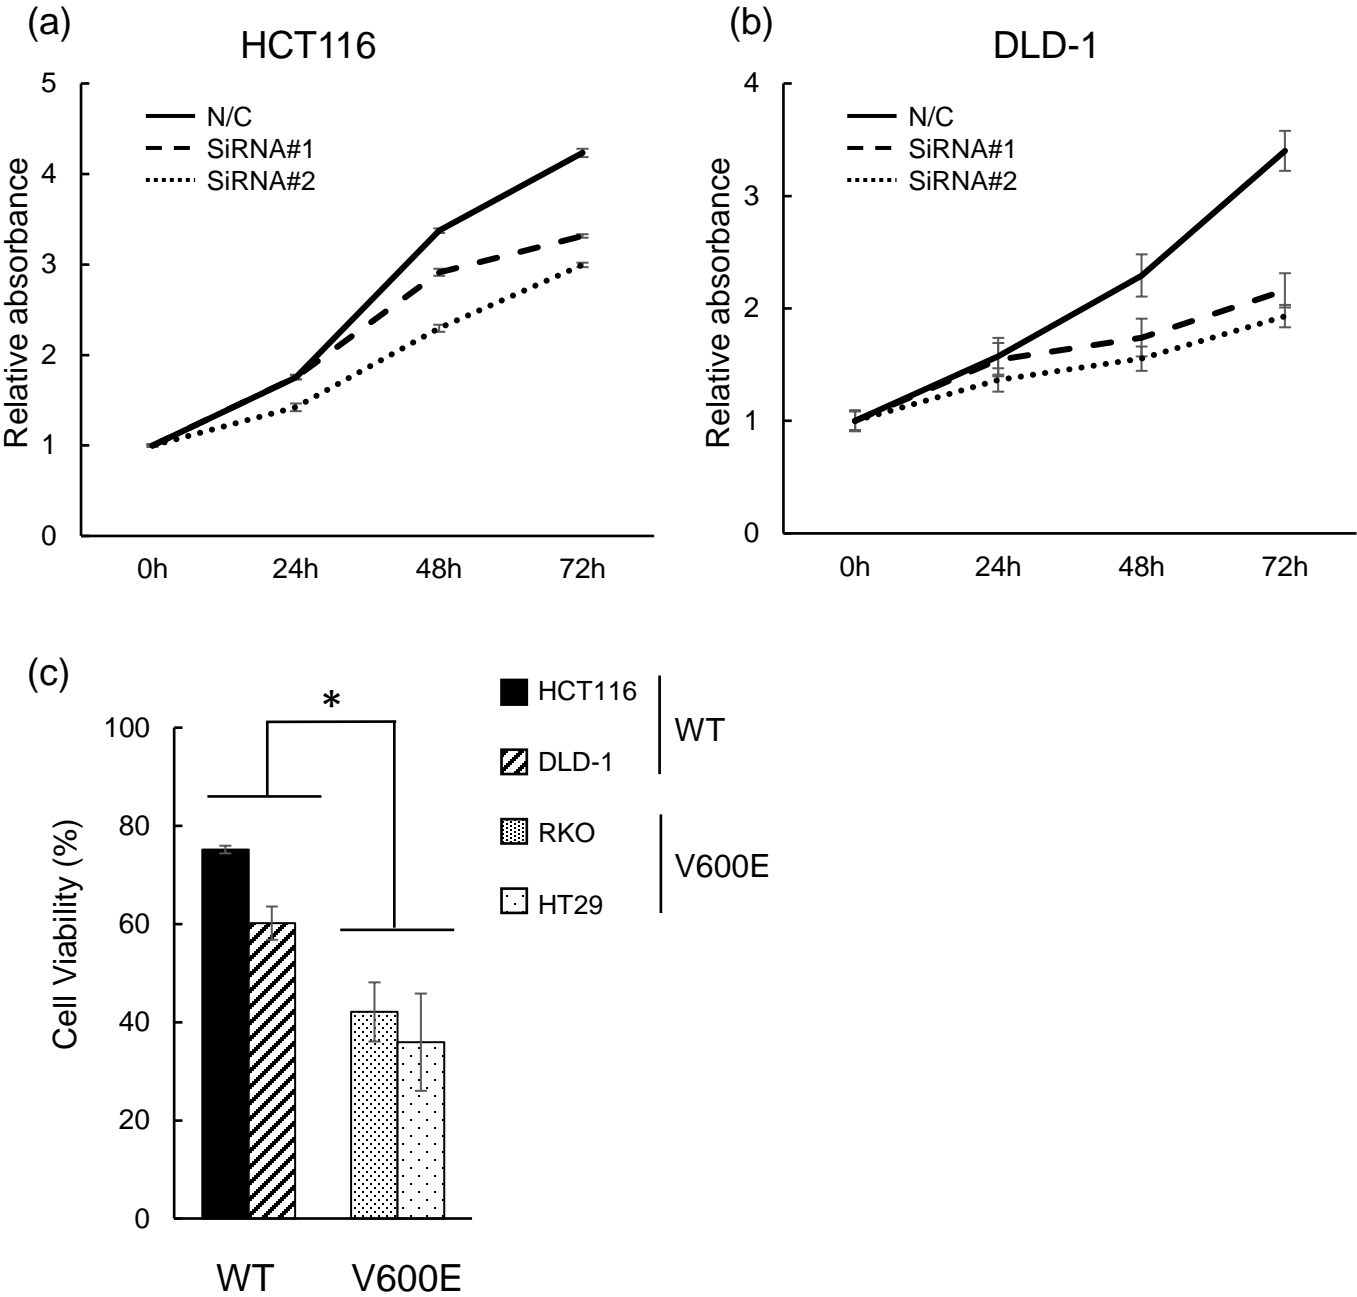

**Supplementary Fig. S3.** Impact of ENO2 knockdown on proliferation of BRAF wild-type CRC cells

- (a) Proliferation assay after transfection with N/C or ENO2 siRNAs in HCT116.
- (b) Proliferation assay after transfection with N/C or ENO2 siRNAs in DLD1.
- (c) Bar plots showing the cell viability of CRC cells in 72h after transfection in CRC cell lines. HCT116 (BRAF wild-type), DLD-1 (BRAF wild-type), RKO (BRAF V600E-mutated), and HT29 (BRAF V600E-mutated) with the siRNAs. \*p<0.05

## Supplementary Fig. S4

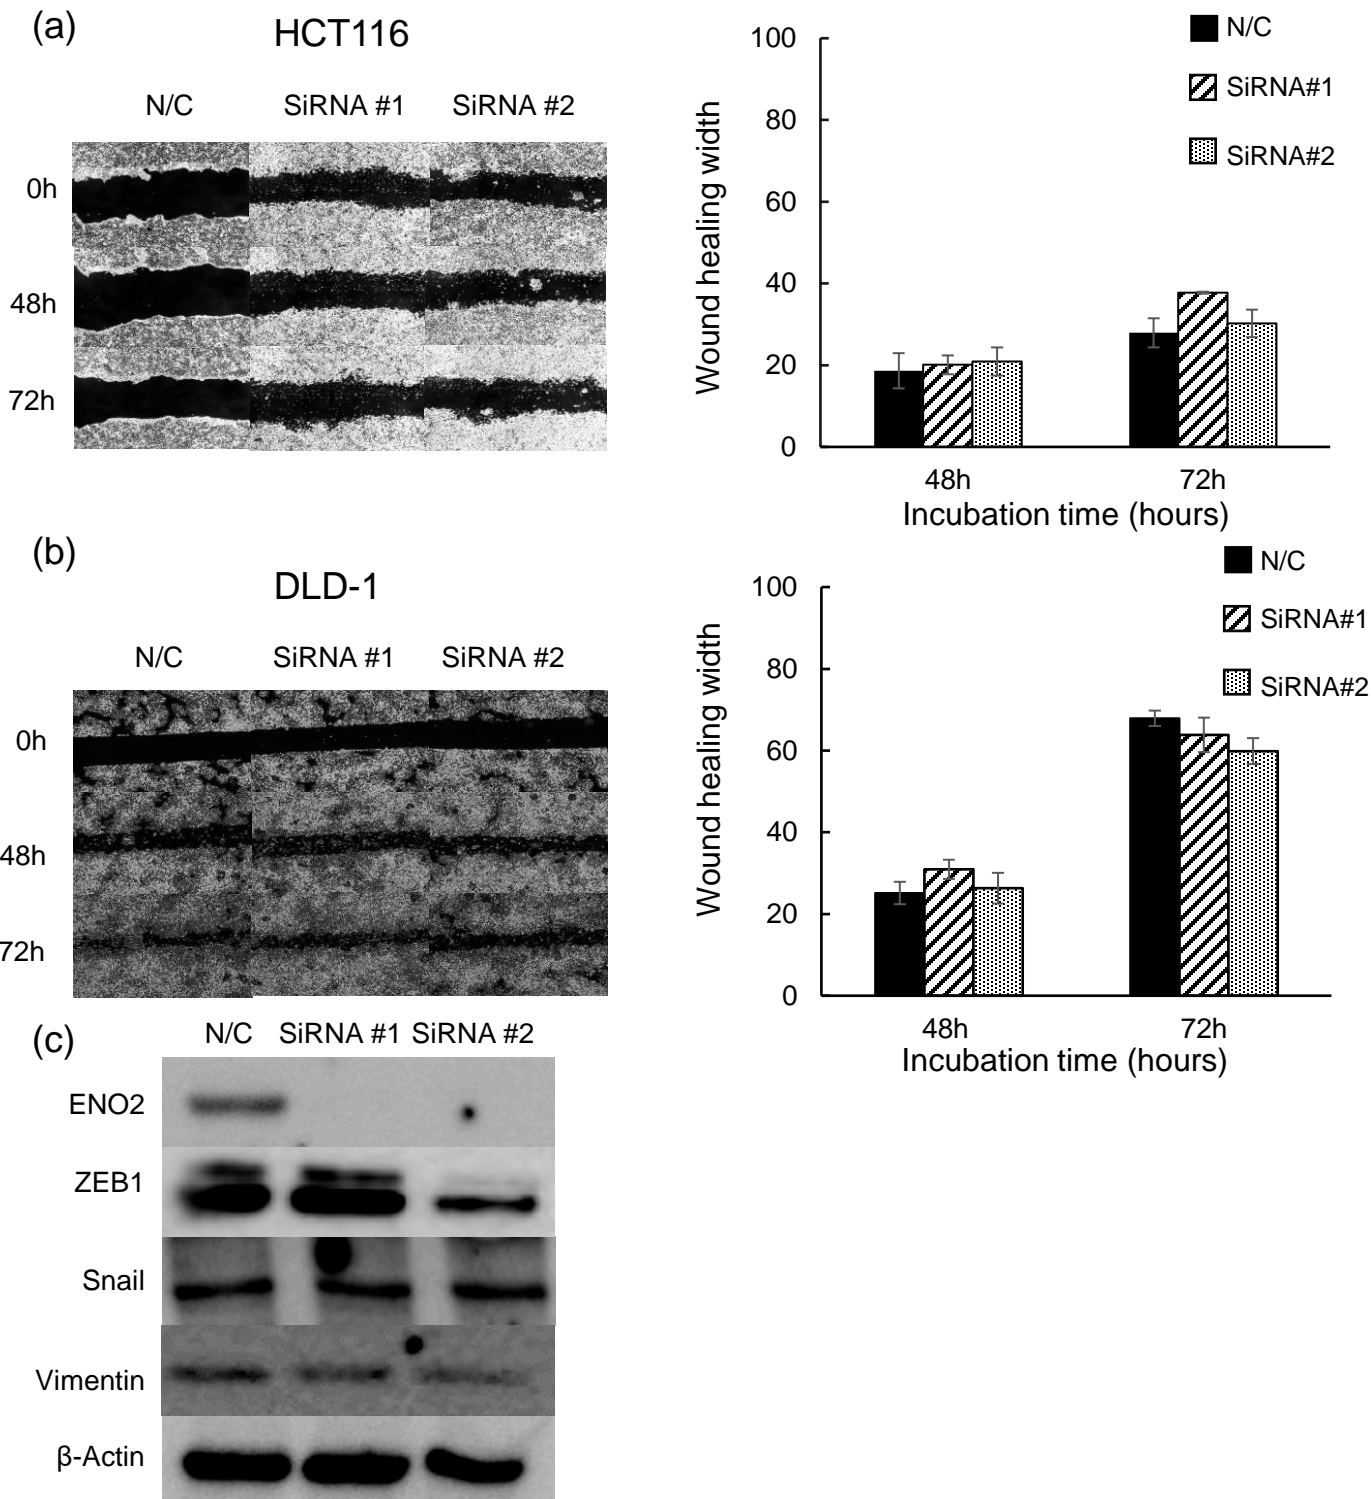

### Supplementary Fig. S4. Impact of ENO2 knockdown on BRAF wild-type CRC cell.

- (a) (left) Representative pictures of scratch wound healing assay of HCT116 cells transfected with N/C or ENO2 siRNAs. Magnification: x100.  
(right) Average distance between wound edges for 5 different areas at the indicated time points (relative change from the distance at 0 h). Each bar presents the mean  $\pm$  SEM of triplicate measurements (\* $p < 0.05$ ).
- (b) (left) Representative pictures of scratch wound healing assay of DLD-1 cells transfected with N/C or ENO2 siRNAs. Magnification: x100.  
(right) Average distance between wound edges for 5 different areas at the indicated time points (relative change from the distance at 0 h). Each bar presents the mean  $\pm$  SEM of triplicate measurements (\* $p < 0.05$ ).
- (c) Epithelial mesenchymal transition (EMT) related protein expression levels in RKO cells transfected with N/C and ENO2 siRNAs (siRNA#1 and siRNA#2) in western blot analysis.

# Supplementary Fig. S5

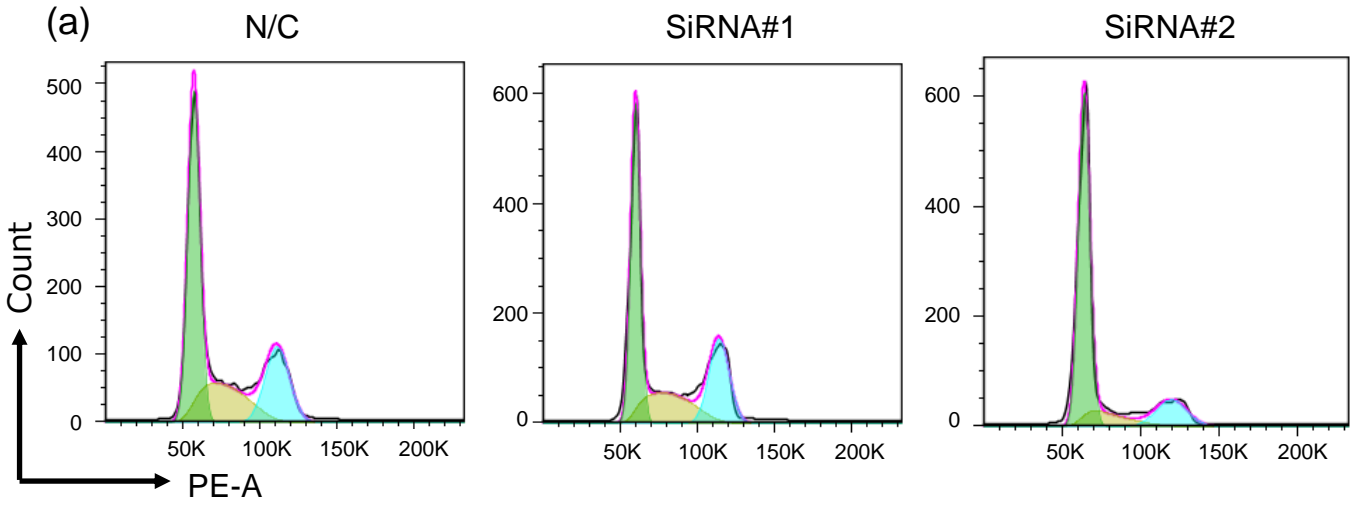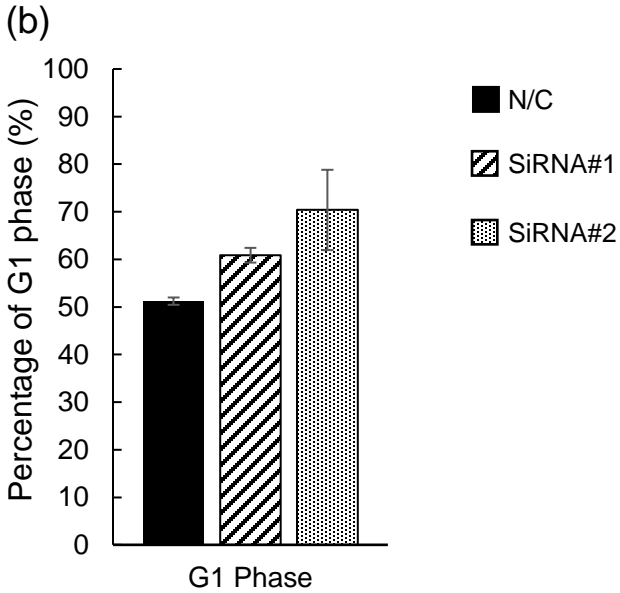

**Supplementary Fig. S5.** Impact of ENO2 knockdown on cell cycle progression in BRAF V600-mutated CRC cells

- (a) Histogram showing cell cycle analysis in RKO cells transfected with N/C or ENO2 siRNAs.
- (b) Proportion of cells in G1 phase.

# Supplementary Fig. S6

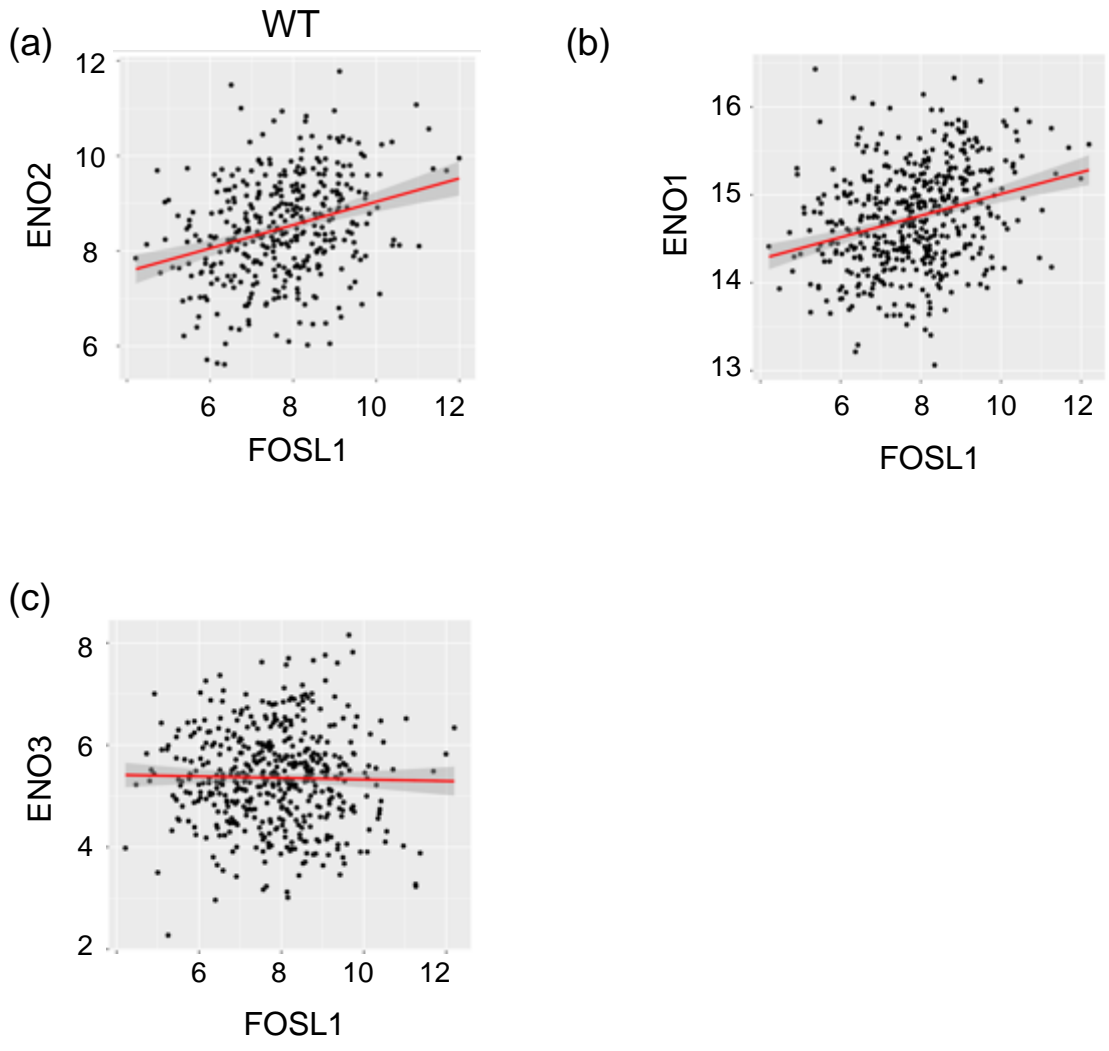

**Supplementary Fig. S6.** Correlation between ENO2 and FOSL1 expression according to BRAF mutation status

- (a) Correlation between ENO2 and FOSL1 expression in BRAF wild type (n= 373, r=0.30, p=5.48e-09)
- (b) Correlation between ENO1 and FOSL1 expression (n=481, r= 0.29, p= 1.59e-10)
- (c) Correlation between ENO3 and FOSL1 expression (n=481, r= -0.22, p= 0.63)

# Supplementary Fig. S7

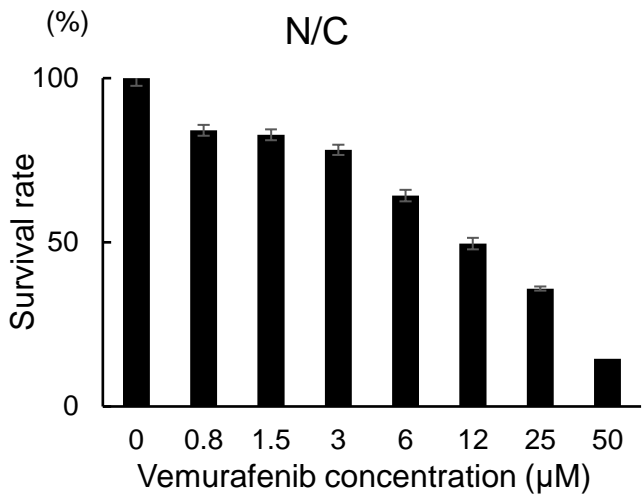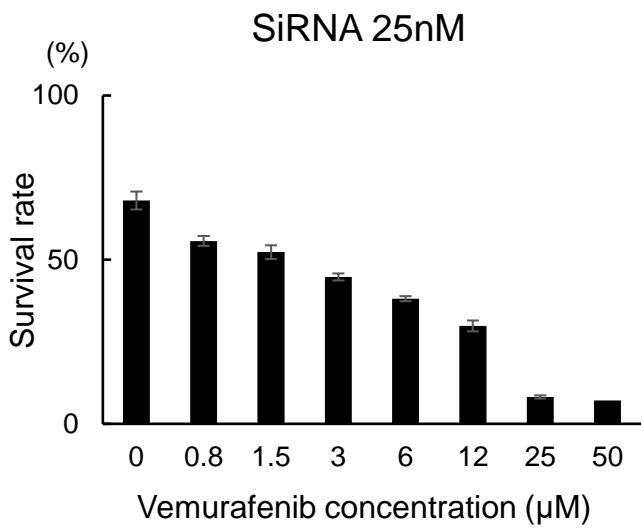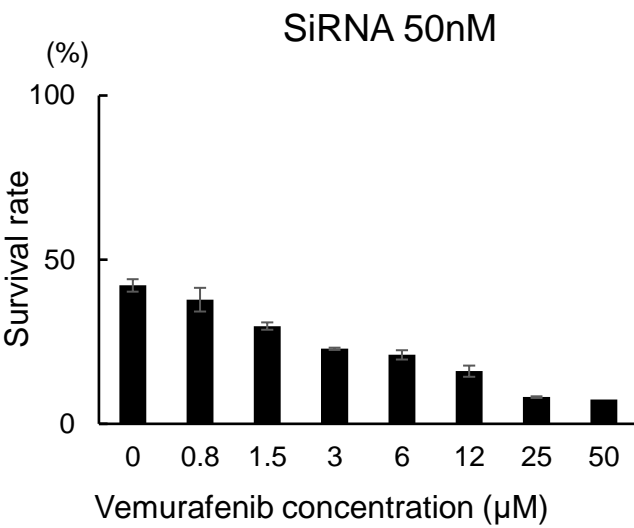

**Supplementary Fig. S7.** Rate of Viable cell numbers at each vemurafenib concentrations divided by cell numbers with negative control SiRNA and without vemurafenib exposure as 100%
