# Supplementary material for: Specific activation of glycolytic enzyme enolase 2 in BRAF V600E‐mutated colorectal cancer
Source: PubMed Central journal article supplement — Cancer Sci. 2021 May 14;112(7):2884–94. doi: 10.1111/cas.14929 (PMC8253290; doi:10.1111/cas.14929), 2021-05-14
Supplement: CAS-112-2884-s002.pdf [file CAS-112-2884-s002.pdf]

**Table S1.** ENO2 expression and clinicopathological features of CRC patients

|                         | <b>Positive (N=37)<br/>Number (%)</b> | <b>Negative (N=84)<br/>Number (%)</b> | <b>P-value</b>  |
|-------------------------|---------------------------------------|---------------------------------------|-----------------|
| Gender                  |                                       |                                       |                 |
| Male                    | 26 (70.3)                             | 46 (54.8)                             | 0.159           |
| female                  | 11 (29.7)                             | 38 (45.2)                             |                 |
| Tumor characteristics   |                                       |                                       |                 |
| tub1, tub2              | 34 (91.9)                             | 80 (95.2)                             | 0.436           |
| por sig, muc            | 3 (8.1)                               | 4 (4.8)                               |                 |
| Depth                   |                                       |                                       |                 |
| Tis, T1, T2             | 8 (21.6)                              | 37 (44.0)                             | 0.024           |
| T3, T4                  | 29 (78.4)                             | 47 (56.0)                             |                 |
| Lymph node metastasis   |                                       |                                       |                 |
| N0                      | 17 (46.0)                             | 60 (71.4)                             | 0.013           |
| N1, N2, N3              | 20 (54.0)                             | 24 (18.6)                             |                 |
| Distant metastasis      |                                       |                                       |                 |
| M0                      | 31 (83.8)                             | 81 (96.4)                             | 0.023           |
| M1                      | 6 (16.2)                              | 3 (3.6)                               |                 |
| Lymphatic duct invasion |                                       |                                       |                 |
| ly0                     | 8 (21.6)                              | 40 (47.6)                             | 0.009           |
| ly1, ly2                | 29 (78.4)                             | 44 (52.4)                             |                 |
| Venous invasion         |                                       |                                       |                 |
| V0                      | 22 (59.5)                             | 62 (73.8)                             | 0.136           |
| V1, v2                  | 15 (40.5)                             | 22 (26.2)                             |                 |
| Stage                   |                                       |                                       |                 |
| 0, I, II                | 16 (43.2)                             | 60 (71.4)                             | 0.004           |
| III, IV                 | 21 (56.8)                             | 24 (28.6)                             |                 |
| <b>BRAF V600E</b>       |                                       |                                       |                 |
| Wild type               | <b>31 (83.8)</b>                      | <b>83 (98.8)</b>                      | <b>&lt;0.05</b> |
| Mutated type            | <b>6 (16.2)</b>                       | <b>1 (1.2)</b>                        |                 |

Abbreviations: tub1, well-differentiated tubular adenocarcinoma; tub2, moderately differentiated tubular adenocarcinoma; por, poorly differentiated adenocarcinoma; muc, mucinous adenocarcinoma.
